# Supplementary material
Source: PubMed Central journal article supplement (PMC7755725)

Fig. 3a. BbpA

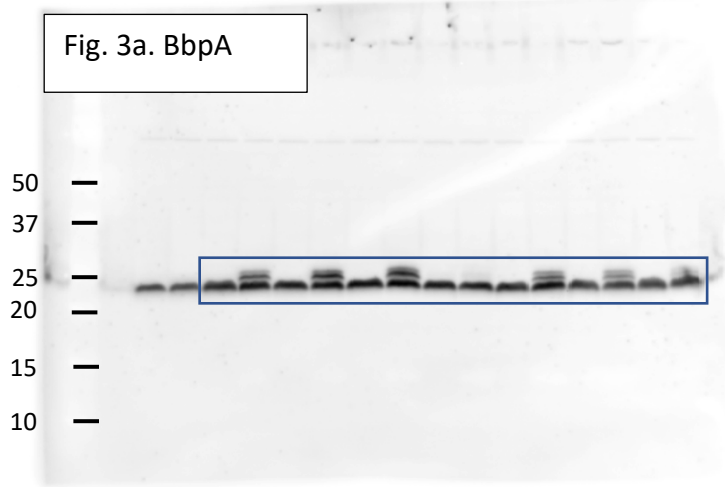

Fig. 3a. LimB

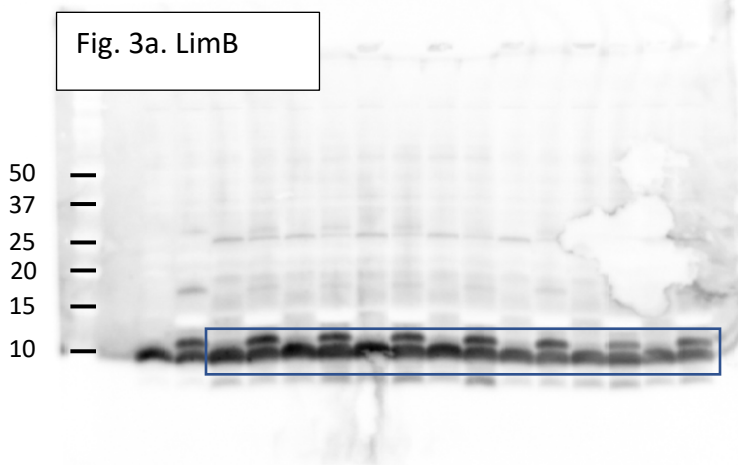

Supplement: NIHMS1629847-supplement-1629847_Source_Dat_Fig_3a.pdf [file NIHMS1629847-supplement-1629847_Source_Dat_Fig_3a.pdf]
